# Supplementary material for: Replication of a pathogenic non-coding RNA increases DNA methylation in plants associated with a bromodomain-containing viroid-binding protein
Source: PubMed Central journal article supplement (PMC5073342; doi:10.1038/srep35751), 2016-10-21
Supplement: srep35751-s1.pdf [file srep35751-s1.pdf]

**Replication of a pathogenic non-coding RNA increases DNA methylation in plants associated with a bromodomain-containing viroid-binding protein**

Dian-Qiu Lv<sup>1,2#</sup>, Shang-Wu Liu<sup>1,3#</sup>, Jian-Hua Zhao<sup>3</sup>, Bang-Jun Zhou<sup>3†</sup>, Shao-Peng Wang<sup>1</sup>, Hui-Shan Guo<sup>3</sup> and Yuan-Yuan Fang<sup>3\*</sup>

<sup>1</sup>Virus-free Seedling Research Institute, Heilongjiang Academy of Agricultural Sciences, Harbin, China

<sup>2</sup>Heilongjiang Academy of Agricultural Sciences Postdoctoral Programme

<sup>3</sup>State Key Laboratory of Plant Genomics, Institute of Microbiology, Chinese Academy of Sciences, Beijing, China

<sup>†</sup>Current address: Plant Science Innovation Center and Plant Pathology department, University of Nebraska, Lincoln

<sup>#</sup>equal contribution

\*Corresponding author: Yuan-Yuan Fang

e-mail: [fangyy@im.ac.cn](mailto:fangyy@im.ac.cn)

Tel: 010-64854989

Fax: 010-64847989

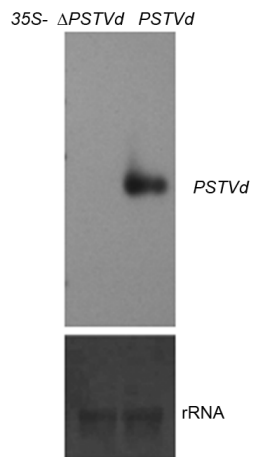

### Supplementary Figure S1.

Confirmation of non-replicative 35S- $\Delta$ PSTVd and replicative 35S-PSTVd. 35S- $\Delta$ PSTVd and 35S-PSTVd were transiently expressed in *Nicotiana benthamiana* via Agro-infiltration, total RNAs were isolated from infiltrated leaves, the *PSTVd* RNA was examined by RNA gel blotting analysis.

**NbVirp1** 1 ATGGCATCCGCCCTTAGCTAGCCGTAATGAATCTAGCTGGGCTCAGTCTGGTGGTCC 60  
**StVirp1** 1 ATGGCATCCGCCCTTAGCTAGCCGTAATGAATCTAGCTGGGCTCAGTCTGGTGGTCC 60  
**NbVirp1 F**  
**NbVirp1** 61 GGCGGTGGACTCATGGGAAGACCCCTTATCTCATACGCATCTGAACCTAA-CTCTAA 119  
**StVirp1** 61 GGTGGTGGATTATGGGAAAAACCCCTTTTCTCATACAACTGAACCTAATCAC-AA 119  
**NbVirp1** 120 CCCTAAGCCTAAGAAAAAGCAGAAGCAATCCATCAGCATCTAACGGTCGCAAAATGA 179  
**StVirp1** 120 CCCTAACCTAAGAAGAAGCAGAAGCAATCCATCACCCTCTAATGGTCGGCATATTGA 179  
**NbVirp1** 180 TGAATCGCCGGCCGTGACACAAACCGCGTCAGATGATGCTATTCAATTAACCAACGGCC 239  
**StVirp1** 180 TGAATCGCCGGCCGTGACGCAACAGCGCTGATGATGCTATTGTTCAATCAACGGCC 239  
**NbVirp1** 240 GATTGAATCAAGTACCAACGTTGACGGCTCAATCTGGAGGATATGACCTACCAGT 299  
**StVirp1** 240 GATTGAATCAACGACCAACGTTGACGGCTCAATCTGGAGGATATTGACTTTAACT 299  
**NbVirp1** 300 TGCTCGTACAAACAAACCGAGCTCCATGAGCTACGGAGTCGGCTGGTGGCGGAGCTGA 359  
**StVirp1** 300 CGTCTCTTACAAACAAAGCGAGGTCATGAGCTACGGAGTCGGCTGGTGGCGGAGTGA 359  
**NbVirp1** 360 ACAGATCCGAAGCCTCAAGATCGAATCGAATCGGGTCAATGAGCACCAGCAACCCAG 419  
**StVirp1** 360 ACAGATCCGAACCTCAAGATCGAATCGAATCGGGTCAATGAGCACCAGCAACCCAG 419  
**NbVirp1** 420 ATCTCAGGCAAGTCCAAGAAGTTATCGGAAATAAACGGCTACCCCTCCGGATCCAG 479  
**StVirp1** 420 ATCACAGGCAAAATCGAAGAACTATCTGGAAATAAACGGCTACCCCTCCGGATCCAG 479  
**NbVirp1** 480 TAAAGATCCGAAAAAGCTCCCAATGGAGTTGATAATAGAAATTCGGTAATCC-G--GG 536  
**StVirp1** 480 TAAAGATCCGAAAAAGCTCCCAACCGAGTTGAAATAGAAATTTGGTAATCCTGTGG 539  
**NbVirp1** 537 TGGTGTGGTGTAAAGGTATAATCGGAATGGAAAATATGATGAAGGAATGTAGGCAAGT 596  
**StVirp1** 540 TGGTGTGGTGTAAAGGCC---ATCGGAACGGAAGATGATGAAGGAATGTAGGCAAGT 596  
**NbVirp1** 597 TTTGGAAAGCTGATGAAGCATAAAAAGTGGGTGGATTTTCAATACCCCTGTAGATGCTGA 656  
**StVirp1** 597 TTTGGAAAGCTGATGAAGCATAAAAAGTGGGTGGATTTTCAATACCCCTGTAGATGCTGA 656  
**virp1 broi 1F/2F**  
**NbVirp1** 657 AGCCTTGGGTCTTCATGATTACCACCAGATTATTAAGCGACCCATGGATTGGGGACGGT 716  
**StVirp1** 657 AGCCTTGGGTCTTCATGATTACCACCAATTAATTAAGCGACCCATAGATTGGGGACGGT 716  
**NbVirp1** 717 GAAATCCAATTTGTCTAATGTTTTACCCTACCCCTCTGAATTCGCAGTGTAGTGAAG 776  
**StVirp1** 717 TAAATCAAATTTGGCTAAGAAATTTTACCCTACCCCTTTGAATTTGCTGTAGTGAAG 776  
**NbVirp1** 777 GCTTACTTTCAATAACGCCCTCTGTATAACCCCTAAAAAGATCAAGTTATGGGTTTGC 836  
**StVirp1** 777 GCTTACTTTCAATAATGCCCTGTGTATAACCCCTAAAAAGATCAAGTTAATGGCTTGC 836  
**virp1 broi 1R/2R**  
**NbVirp1** 837 CGAGCAACTCCTGGCAGTTTTGAGGACATGTTTAGACCGATTGAGGATAAAATGAATAA 896  
**StVirp1** 837 TGAGCAGCTTCTGGGACGATTTGAGGACATGTTTAGACCGCTCCAGGATAAAATGAATAA 896  
**NbVirp1** 897 GCTTGTATGGGGAAGCGACAGGAGGATTTTCATCCACAGATGAGTTGCAGGGATTTC 956  
**StVirp1** 897 GCTTGAAGCGG-----CAGGAGGATATCATCTGTAGATGAGTTGCAGGGAGTTC 950  
**NbVirp1** 957 TTGGAATCACATTCCTACGCGGAGAGAGTGAAGAAGCCAAAGCCTACTCCGGCCCTCA 1016  
**StVirp1** 951 TTGGAATCACATACCTACGCGGAGAGAGTGAAGAAACCAAGGCTACTCCAGTCCCTCA 1010  
**NbVirp1** 1017 CATTTCAAAGAGCAGGAGCGAATGATGAGAATCATTGAGTGTCTTAACTCTGCCAGT 1076  
**StVirp1** 1011 CATTTCAAAGAGCAGAGCG---GATGCAAAATCATTAGTGGCTCAACCCCTCTTT 1067  
**NbVirp1** 1077 GC-AGCAGCCACCAGACAATACACCAGTGGTGCGGACGAGTCTTTGTTGCAACTCCTT 1135  
**StVirp1** 1068 GCCAGT-GCCACCACCAATCCACCAGCC---CGGACGAGTCCCAATTTGCAACTCCTT 1123  
**NbVirp1** 1136 CCCCAGTAGGGCACCACCAGCGCAAAAGCCTCAATCATCGGTGCTGCTAAAGTGCCTC 1195  
**StVirp1** 1124 CCCCAGTAGGGCACCACCCTCG--AA-GCCTGAATCA-----GCTGCTAAAGTTCTGT 1174  
**NbVirp1** 1196 CTATGGGAAGCAACCAAGCCGAGAGCGAAGGATCCAAATAAAGAGAGATGAGTATGG 1255  
**StVirp1** 1175 CTATGGGAAGCAACCTAAACCGAGGCAAGGATCCAAATAAAGAGATGATGAATATGG 1234  
**NbVirp1** 1256 AGGAGAAGCATAAATAGGAGTTGGGTGCAAAAGTTGGCCAAAGAGAAGATGCCGAGT 1315  
**StVirp1** 1235 AGGAGAAGCATAAATAGGAGTTGGGTGCAAAAGTTGGCCAAAGAGAAGATGCCGAGT 1294  
**NbVirp1** 1316 TAGTACAGATTATAAGGAAGAGGAATGAGCATTAGCCCAAGATGGCGATGAGATTGAGC 1375  
**StVirp1** 1295 TGGTGCAGATTATAAGGAAGAGGAATGAACATTTAGCCCAAGCGGTGACGAGATTGAGC 1354  
**NbVirp1** 1376 TTGACATTGAGGCCCTTGACACGGAGACTCTGTTGGAGCTTGTGCTTTCTGTGACCAATT 1435  
**StVirp1** 1355 TCGACATTGAGGCCCTTGACACGGAGACTCTATGGGAGCTTGTGCGTTTGTGACCAATT 1414  
**NbVirp1** 1436 GGAAGAAGATGTTGAGCAAACTAAAAGCAGGCGTTGATCA--A-CAATTTGGGACAGC 1492  
**StVirp1** 1415 GGAAGAAGATGTTGAGCAAACTAAGAGCAGGCATTGATGATTAACAATTTGGGA---C 1471  
**NbVirp1** 1493 CACCATCCGCCAGTGTGCAGCTTCTGTGCTACTACAACATCCGTTGCAGAGGCTGATG 1552  
**StVirp1** 1472 CACCATCCGCCAGTGTGCAGCTTCTGTGCAACT---ACATCCGTGCGCAAGCAGATG 1528  
**NbVirp1** 1553 CGCTAGTACAAGCGAAAAATGACTCCTTTAAAAAGCCAAAAAGGGGGTGTAGCTG 1612  
**StVirp1** 1529 GGCTACCAGTGTGAAAAATGATTCCTTAAAAAGCCAAAA---GGTGTAGTTG 1585  
**NbVirp1** 1613 GAGATGAGGATGATGATAGATAGAGGATGATGAACCAGCCACCCACTTTCTCCTGTGG 1672  
**StVirp1** 1586 GAGAAGAG---GATGTAGATAGAGGATGATGAACCAGCTACCCATTTCTCCAGTGG 1642  
**NbVirp1** 1673 AAATTGACAAGGATGAaggTggTggTggTggTgTGGGCAAGATCCTGATAAATAATG 1732  
**StVirp1** 1643 AAATTGAGAAGGATGAAGTGGTGG-GC-GG-GATCAAGAG-AA--TGTTGGTGGT-G 1694  
**NbVirp1** 1733 CTAGTAGTAGCTCCAGTAGTTCCAGCAGTCCAGCAGTATTCTCTCTTCTAGTGATT 1792  
**StVirp1** 1695 -TAGTAGTAGCTCTAGTAGTTCTAGCAGCTCAAGCAGTGGCTCCTCTCTTCTAGTGATT 1753  
**NbVirp1** 1793 CTGATTACGAAAGTCTTCAGGAGTACTCTGATGCTGATGATGACACTCTTGA 1848  
**StVirp1** 1754 CTGATTACGAAAGTCTATCCGGAAGTACTCTGATGCTGATGATGACACTCTTGA 1809  
**NbVirp1 R**

Supplementary Figure S2

Alignment of *NbVirp1* and *StVirp1* sequences. The *NbVirp1* and *StVirp1* sequences share 87% identity at the nucleotide level. The primers for amplification of the full-length *NbVirp1* and generation of NbVirp1-RNAi constructs are marked at related positions in red.

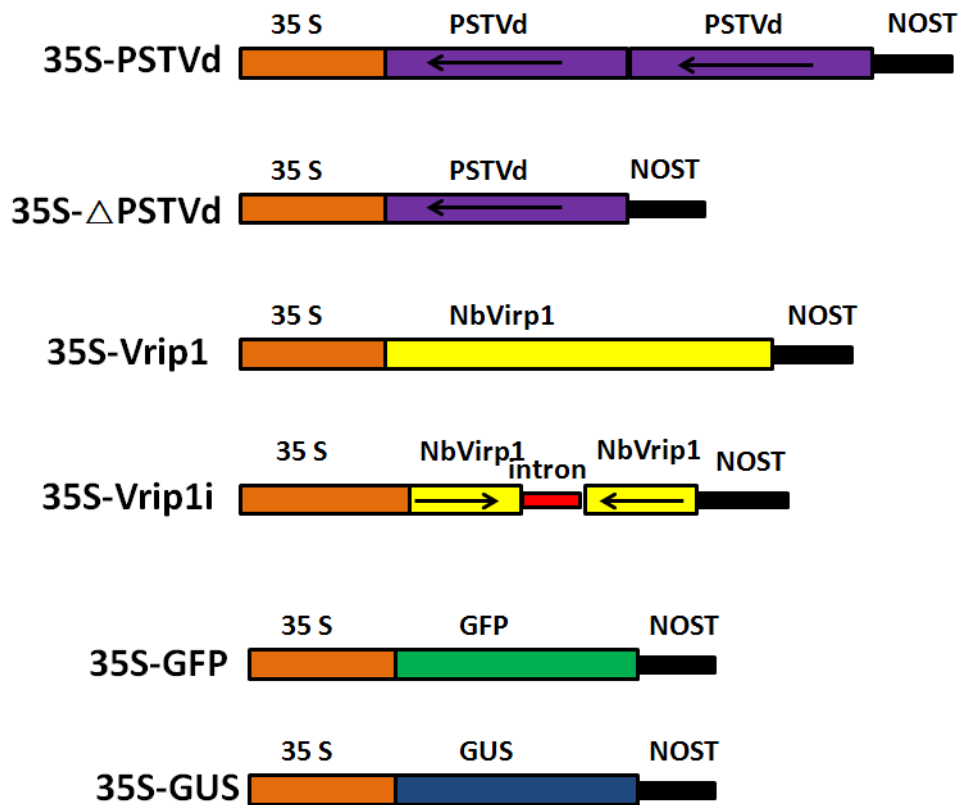

Supplementary Figure S3

A simple diagram showing all constructs used in this study.

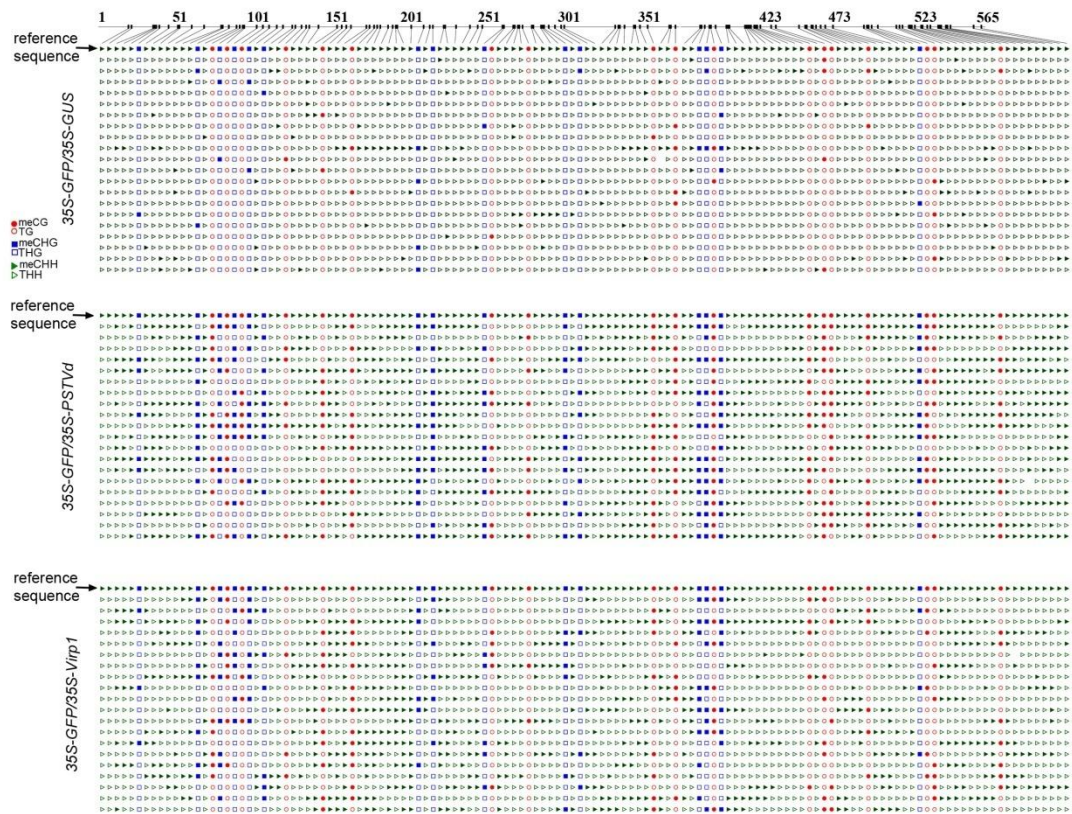

Supplementary Figure S4.

The original data of bisulfite sequencing of the 35S promoter of the *35S-GFP* transgene in 16c plants co-infiltrated with *35S-GFP/35S-GUS*, *35S-GFP/35S-PSTVd* or *35S-GFP/35S-Virp1*. Red circle: CG site, blue square: CHG and green triangle: CHH. Methylated cytosines were symbolized with related solid shapes. Positions of cytosines are indicated at the top.

Supplementary Table S1. List of primer and probe used in this study

| Primer name | Primer sequence(5'to3')                    | Purpose                            |
|-------------|--------------------------------------------|------------------------------------|
| PC0054      | <b>GGATCCCTGAAGCGCTCCTCCGAGCCG</b>         | For 35S-PSTVd, PSTVd probe         |
| PH0055      | <b>GAGCTCCCGGGAAACCTGGAGCGAACTGG</b>       | production                         |
| NbVirp1 F   | <b>CCCGGGATGGCATCCGCCGTCTTAGCTAGC</b>      | For 35S-Virp1, Virp1 probe         |
| NbVirp1 R   | ACGCGTTCAAGAGTGTGCATCATCAG                 | production                         |
| P8 F        | <b>AAGAGCTCACCAACTGCGGTTCCAAG</b>          | For 35S-ΔPSTVd                     |
| P9 R        | ATCTAGAGGTTCTGTGGTTCACACC                  |                                    |
| virp1broi1F | <b>GCTCGAGTCTAGAATATCCCAGTTGATGCTGAAGC</b> | For Virp1i                         |
| virp1broi1R | <b>CAGATCTACAAGGCATTATTGAAAGTAAGC</b>      |                                    |
| virp1broi2F | <b>CGGATCCGAGCTCATATCCCTGTTGATGCTGAAGC</b> |                                    |
| virp1broi2R | <b>GCTGCAGACAAGGCATTATTGAAAGTAAGC</b>      |                                    |
| 35S+G F     | AAGTAATAGAGATTGGAGTTTTTAAAAAGGTAG          | For DNA Bisulphite Sequencing      |
| 35S+G R     | AATAAATTTTCCRTATATTACATCACCTTCACCCTC       |                                    |
| Q11752F     | AGGGTGGAGATCGACTTA                         | Cellulose synthase primer for      |
| Q11752R     | ATGGGATTGAGATGTGATAAAC                     | qRT-PCR                            |
| Q14997F     | ACTAATCTCATCATCGCC                         | Zinc finger protein primer for     |
| Q14997R     | CTCTGGATAGTAGTACATT                        | qRT-PCR                            |
| Q19517F     | CATACCCAGAGGGACGAT                         | Chitin-binding lectin 1 primer for |
| Q19517R     | CTTGACAGTTTACAGGAGC                        | qRT-PCR                            |
| Q35647F     | AGGGCTCAAGGGATTTAC                         | Disease resistance response        |
| Q35647R     | CCTCCAACAATAGGCATC                         | protein primer for qRT-PCR         |
| EF1-αF      | ATTGGAAACGGATATGCTCCA                      | the internal standard EF1-α        |
| EF1-αR      | TCCTTACCTGAACGCCTGTCA                      | primer for qRT-PCR                 |
| 11752F      | AGTCTCAGTGTGGCATAGTAGGAAC                  | Cellulose synthase primer for      |
| 11752R      | AGAGGGAGTATGAGTTTAGGGGTTG                  | McBC-PCR                           |
| 14997F      | ACAACCAAATCTCCCTTCG                        | Zinc finger protein primer for     |
| 14997R      | CTCTGATAAAGACGACCA                         | McBC-PCR                           |
| 19517F      | ATCCCGAATAGGAGAAGT                         | Chitin-binding lectin 1 primer for |
| 19517R      | ATGCTGGTATGTTGTATTGA                       | McBC-PCR                           |
| 35647F      | CACCCTTGCCTATGCTAC                         | Disease resistance response        |
| 35647R      | GAGAATCGCTCAGTGTTG                         | protein primer for McBC-PCR        |
| GFP-F       | ATGAGTAAAGGAGAAGAAGACTTTTC                 | For GFP probe production           |
| GFP-R       | TTTGTATAGTTCATCCATGC                       |                                    |
| U6          | GCTAATCTTCTCTGTATCGTTCC                    | For U6 detection                   |
| miR159      | TAGAGCTCCCTTCAATCCAAA                      | For miR159 detection               |
| miR167      | TAGATCATGCTGGCAGCTTCA                      | For miR167 detection               |

Full-length figures

Figure 1A

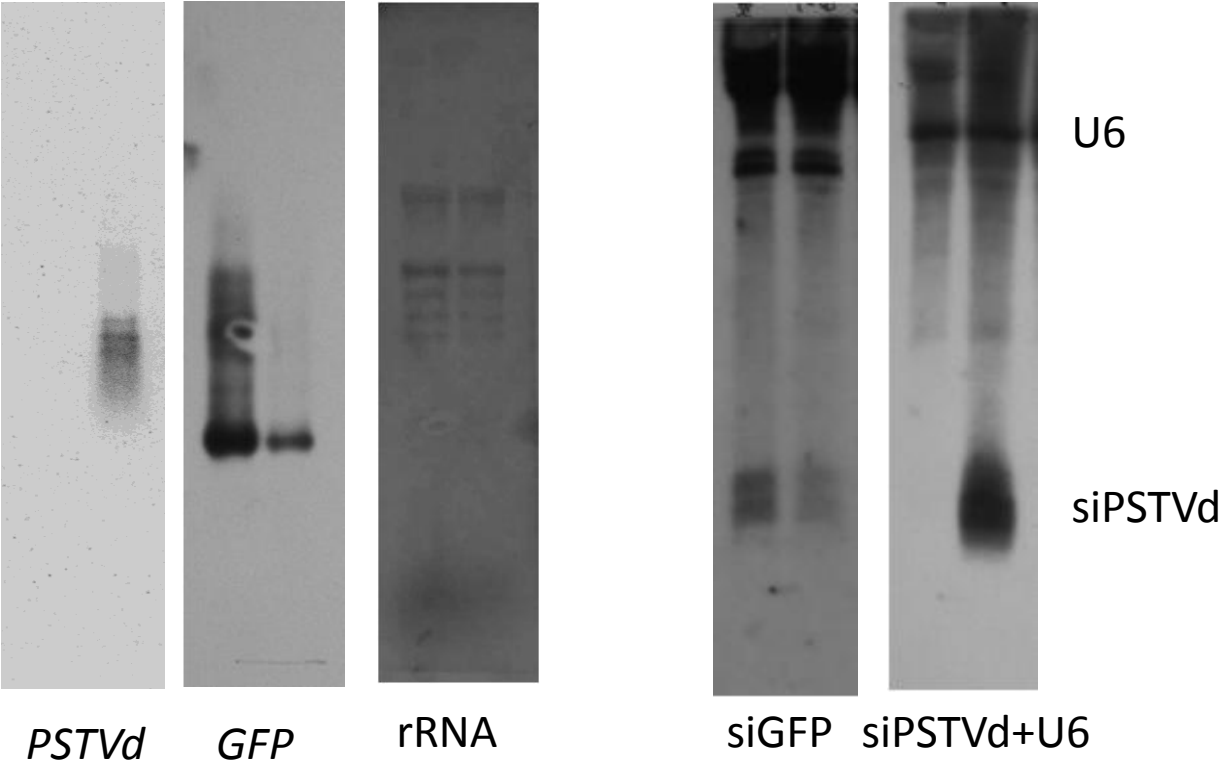

Figure 2B

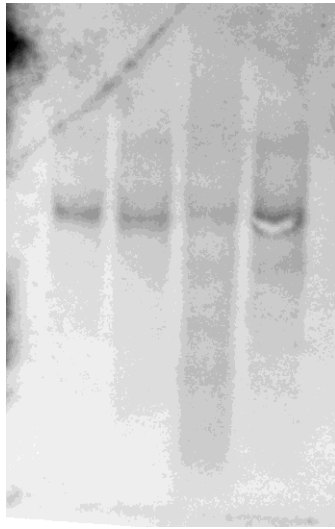

*Virp1*

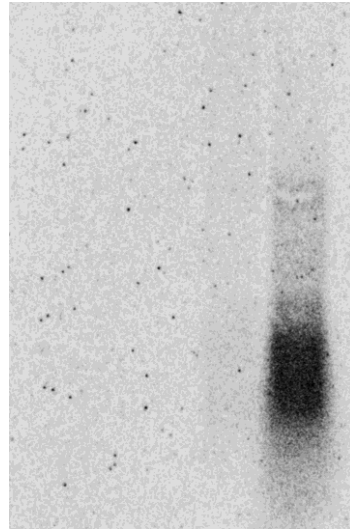

*PSTVd*

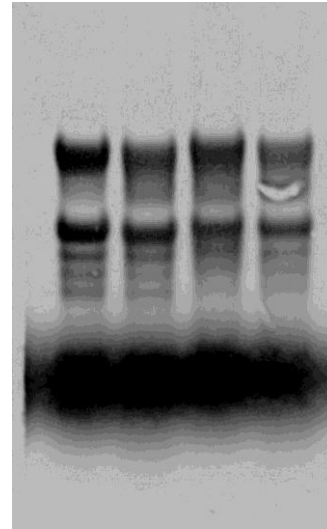

rRNA



Figure 3B

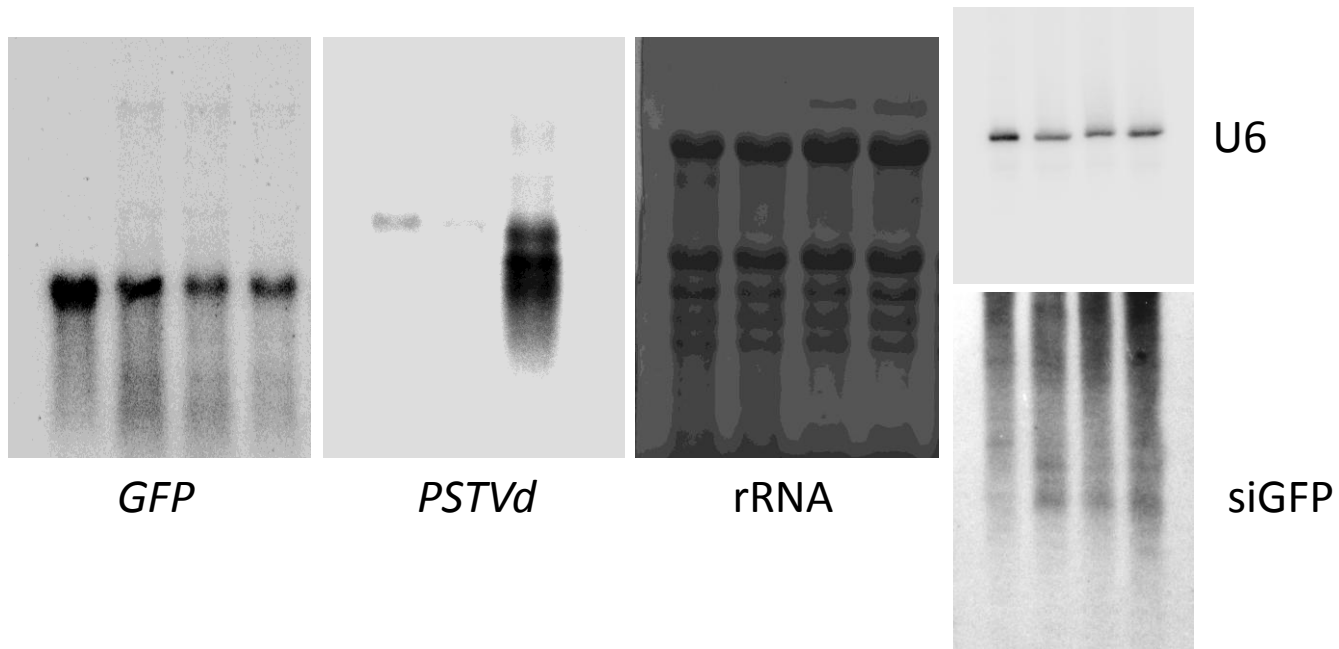

Figure 4B

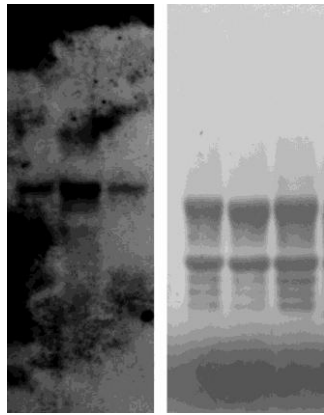

*Virp1*

rRNA

Figure 4C

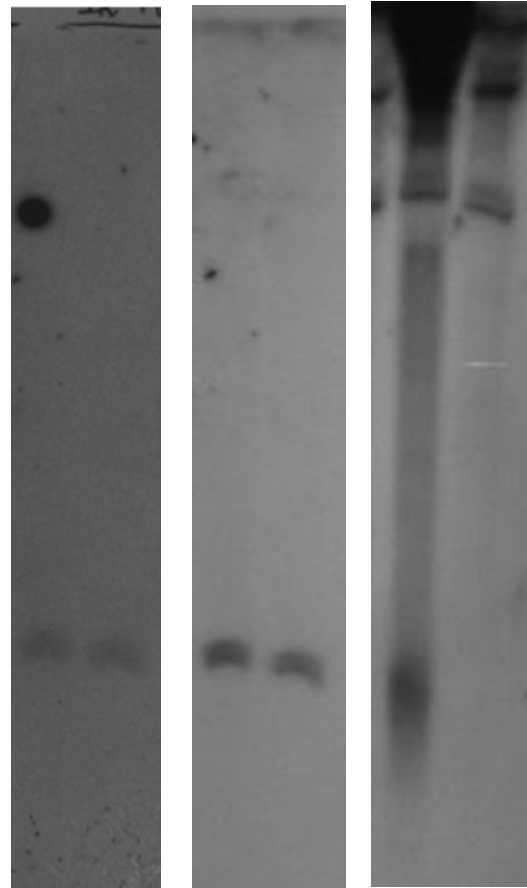

miR167

miR159

siPSTVd + U6

U6

siPSTVd

Figure 4D

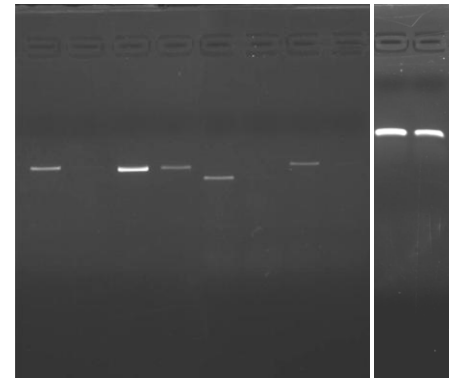

McrBC PCR
